# Supplementary material for: Integrated analysis of single-cell and bulk RNA sequencing data reveals a pan-cancer stemness signature predicting immunotherapy response
Source: PubMed Central journal article supplement (PMC9052621; doi:10.1186/s13073-022-01050-w), 2022-04-29
Supplement: 13073_2022_1050_MOESM1_ESM.pdf [file 13073_2022_1050_MOESM1_ESM.pdf]

## Supplementary Material

|                                                                                 |   |
|---------------------------------------------------------------------------------|---|
| Table S1. Characteristics of ICIs scRNA cohorts.....                            | 2 |
| Table S2. List of scRNA datasets applied to develop Stem.Sig. ....              | 3 |
| Table S3. List of immunotherapy cohorts used in this study.....                 | 4 |
| Table S4. List of CRISPR datasets.....                                          | 5 |
| Table S5. List of predictive gene expression signatures for immunotherapy ..... | 6 |
| Table S6. Gene list of Stem.Sig.....                                            | 7 |
| Table S7. Comparison of AUC of previous signatures in testing cohort. ....      | 8 |

**Table S1. Characteristics of ICIs scRNA cohorts.**

|                      | <b>SKCM[1]</b>  | <b>BCC[2]</b>   |
|----------------------|-----------------|-----------------|
| Patients             |                 |                 |
| Response             | 0               | 6               |
| Non-response         | 11              | 4               |
| Treatment naïve      | 13              | 0               |
| Overall              | 24 <sup>1</sup> | 10 <sup>2</sup> |
| Malignant cells      | 2142            | 1826            |
| GEO Accession number | GSE115978       | GSE123813       |

<sup>1</sup> Seven patients have been removed from GSE115978 due to lack of malignant cells data.

<sup>2</sup> One patient has been removed from GSE123813 due to its aberrant mutation and CNV profiles compared with other patients in this cohort.

**Table S2. List of scRNA datasets applied to develop Stem.Sig.**

| <b>Dataset Name</b> | <b>Cancer</b> | <b>Patients</b> | <b>Cells</b> | <b>Platform</b> | <b>PMID</b>             |
|---------------------|---------------|-----------------|--------------|-----------------|-------------------------|
| GSE123813[2]        | BCC           | 11              | 52884        | 10x Genomics    | 31359002                |
| GSE143423[3]        | BRCA          | 2               | 4375         | 10x Genomics    | <a href="#">bioRxiv</a> |
| SRP114962[4]        | BRCA          | 8               | 2472         | SNRS            | 29681456                |
| GSE125449[5]        | CHOL          | 10              | 5761         | 10x Genomics    | 31588021                |
| GSE146771[6]        | CRC           | 10              | 10468        | Smart-seq2      | 32302573                |
| GSE102130[7]        | GBM           | 6               | 3321         | Smart-seq2      | 29674595                |
| GSE103224[8]        | GBM           | 8               | 17185        | Microwell       | 30041684                |
| GSE131928a[9]       | GBM           | 9               | 13553        | 10x Genomics    | 31327527                |
| GSE131928b[9]       | GBM           | 28              | 7930         | Smart-seq2      | 31327527                |
| GSE138794[10]       | GBM           | 9               | 18458        | 10x Genomics    | 31554641                |
| GSE139448[11]       | GBM           | 3               | 12152        | 10x Genomics    | 32004492                |
| GSE141982[12]       | GBM           | 2               | 5263         | 10x Genomics    | 32105316                |
| GSE148842[13]       | GBM           | 7               | 111397       | Microwell       | <a href="#">bioRxiv</a> |
| GSE70630[14]        | GBM           | 6               | 4347         | Smart-seq2      | 27806376                |
| GSE84465[15]        | GBM           | 4               | 3533         | Smart-seq2      | 29091775                |
| GSE89567[16]        | GBM           | 10              | 6341         | Smart-seq2      | 28360267                |
| GSE103322[17]       | HNSC          | 18              | 5902         | Smart-seq2      | 29198524                |
| GSE125449[5]        | LIHC          | 9               | 3834         | 10x Genomics    | 31588021                |
| GSE119926[18]       | MB            | 25              | 7745         | Smart-seq2      | 31341285                |
| GSE117988[19]       | MCC           | 1               | 10134        | 10x Genomics    | 30250229                |
| GSE118056[19]       | MCC           | 1               | 11024        | 10x Genomics    | 30250229                |
| GSE117156[20]       | MM            | 14              | 24918        | MARS-seq        | 30523328                |
| GSE140312[21]       | NET           | 1               | 3158         | 10x Genomics    | 32054662                |
| EMTAB6149[22]       | NSCLC         | 8               | 40218        | 10x Genomics    | 29988129                |
| GSE117570[23]       | NSCLC         | 4               | 11453        | 10x Genomics    | 31033233                |
| GSE127465[24]       | NSCLC         | 7               | 31179        | Smart-seq2      | 30979687                |
| GSE143423[3]        | NSCLC         | 3               | 12193        | 10x Genomics    | <a href="#">bioRxiv</a> |
| GSE118828[25]       | OV            | 9               | 1909         | Smart-seq2      | 30383866                |
| CRA001160[26]       | PAAD          | 35              | 57443        | 10x Genomics    | 31273297                |
| GSE111672[27]       | PAAD          | 3               | 6122         | inDrop          | 31932730                |
| GSE115978[1]        | SKCM          | 31              | 7186         | Smart-seq2      | 30388455                |
| GSE72056[28]        | SKCM          | 19              | 4645         | Smart-seq2      | 27124452                |
| GSE134520[29]       | STAD          | 13              | 41554        | 10x Genomics    | 31067475                |
| GSE139829[30]       | UVM           | 11              | 103703       | 10x Genomics    | 31980621                |
| Overall             | 17            | 345             | 663760       |                 |                         |

**Table S3. List of immunotherapy cohorts used in this study.**

| Cohorts                          | Cancer | Treatment<br>(No. of<br>patients) | All<br>Patients | Response     |               | Multi-variate cox regression analysis of overall survival |     |     |     |        |
|----------------------------------|--------|-----------------------------------|-----------------|--------------|---------------|-----------------------------------------------------------|-----|-----|-----|--------|
|                                  |        |                                   |                 | R<br>(CR/PR) | NR<br>(PD/SD) | Events/Patients                                           | TMB | Sex | Age | Purity |
| <b>Training and Validation</b>   |        |                                   |                 |              |               |                                                           |     |     |     |        |
| Braun 2020 RCC[31]               | RCC    | aPD-1                             | 181             | 39           | 142           | 122/180                                                   | -   | -   | -   | -      |
| Mariathasan 2018 UC[32]          | UC     | aPD-L1                            | 348             | 68           | 280           | 232/348                                                   | -   | -   | -   | -      |
| Liu 2019 SKCM[33]                | SKCM   | aPD-1                             | 121             | 47           | 74            | 62/121                                                    | -   | -   | -   | -      |
| Gide 2019 SKCM <sup>2</sup> [34] | SKCM   | aPD-1 /<br>Combo <sup>3</sup>     | 73              | 33           | 40            | 29/73                                                     | -   | -   | -   | -      |
| Riaz 2017 SKCM[35]               | SKCM   | aPD-1                             | 49 <sup>4</sup> | 10           | 41            | 29/46                                                     | -   | -   | -   | -      |
| <b>Independent Testing</b>       |        |                                   |                 |              |               |                                                           |     |     |     |        |
| Zhao 2019 GBM[36]                | GBM    | aPD-1                             | 17 <sup>5</sup> | 10           | 7             | 9/17                                                      | -   | √   | √   | -      |
| Synder 2017 UC[37]               | UC     | aPD-L1                            | 25              | 6            | 19            | 17/25                                                     | -   | √   | √   | -      |
| Hugo 2016 SKCM[38]               | SKCM   | aPD-1                             | 26 <sup>5</sup> | 12           | 14            | 11/26                                                     | √   | √   | √   | √      |
| Van 2015 SKCM[39]                | SKCM   | aCTLA-4                           | 36              | 14           | 22            | 24/36 <sup>6</sup>                                        | √   | √   | √   | -      |
| Kim 2018 GC <sup>7</sup> [40]    | GC     | aPD-1                             | 45              | 12           | 33            | -                                                         | -   | -   | -   | -      |

<sup>1</sup> During multi-variate cox regression analysis of overall survival, patients with missing covariates data have been deleted.

<sup>2</sup> Gide 2019 cohort had pre-ICT biopsies for melanoma patients treated with either anti-PD-1 (41 patients: 22 non-responders vs 19 responders) or the combination of anti-PD-1 and anti-CTLA-4 drugs (32 patients: 11 non-responders vs 21 responders).

<sup>3</sup> Combo: combined therapy of anti-PD-1 and anti-CTLA4.

<sup>4</sup> Two patients from Riaz 2017 were removed due to unknown response.

<sup>5</sup> Hugo 2016 comprises 27 pre-treated tumor samples from 26 patients. Zhao 2019 comprises 34 pre-treated tumor samples from 17 patients. We randomly selected a single tumor sample that represents the corresponding patient.

<sup>6</sup> Van 2015 has 2 patients deleted due to missingness during multi-variate cox regression analysis of overall survival.

<sup>7</sup> Kim 2018 does not include survival data.

Abbreviation: R: responder; NR: non-responder; RCC: renal cell carcinoma; UC: Urothelial carcinoma; SKCM: skin cutaneous melanoma; GBM: glioblastoma; aPD-1: anti-PD-1 antibody; aPD-L1: anti-PD-L1 antibody; TMB: tumor mutational burden; ITH: intratumor heterogeneity;

**Table S4. List of CRISPR datasets.**

| <b>CRISPR dataset</b> | <b>condition</b>               | <b>cancer</b> | <b>Model cell</b>       |
|-----------------------|--------------------------------|---------------|-------------------------|
| Freeman 2019[41]      | NK <sup>1</sup>                | Melanoma      | B16                     |
|                       | OT1 <sup>2</sup>               | Melanoma      | B16                     |
| Kearney 2018[42]      | NK <sup>1</sup>                | Colon         | MC38                    |
|                       | OT1+IgG <sup>3</sup>           | Colon         | MC38                    |
|                       | OT1+PD1 <sup>4</sup>           | Colon         | MC38                    |
| Manguso 2017[43]      | GVAX <sup>6</sup>              | Melanoma      | B16                     |
|                       | GVAX+PD1 <sup>7</sup>          | Melanoma      | B16                     |
| Pan 2018[44]          | OT1 <sup>2</sup>               | Melanoma      | B16                     |
|                       | Pmel-1_T <sup>8</sup>          | Melanoma      | B16                     |
| Patel 2017[45]        | NY-ESO-1_MART-1_T <sup>9</sup> | Melanoma      | Mel624                  |
| Vredevoogd 2019[46]   | MART1_T <sup>10</sup>          | Melanoma      | D10 IFNGR1 <sup>-</sup> |
| Lawson 2020[47]       | Mid_CTL <sup>5</sup>           | Breast        | EMT6HA                  |
|                       | Mid_CTL <sup>5</sup>           | Breast        | X4T1HA                  |
|                       | Mid_CTL <sup>5</sup>           | Colon         | CT26HA                  |
|                       | Mid_CTL <sup>5</sup>           | Colon         | MC38OVA                 |
|                       | Mid_CTL <sup>5</sup>           | Melanoma      | B16OVA                  |
|                       | Mid_CTL <sup>5</sup>           | Renal         | RencaHA                 |

<sup>1</sup> NK: natural killer cells;

<sup>2</sup> OT1: ovalbumin-specific transgenic CD8 T cells;

<sup>3</sup> OT1+IgG: OT1 + immunoglobulin;

<sup>4</sup> OT1+PD1: OT1 + anti-PD-1 antibody;

<sup>5</sup> Mid\_CTL: cytotoxic cells at mid time point (defined as the population of cells following 1 or 2 treatment rounds);

<sup>6</sup> GVAX: a granulocyte-macrophage colony-stimulating factor (GM-CSF)-secreting, irradiated tumor cell vaccine;

<sup>7</sup> GVAX+PD1: GVAX + anti-PD-1 antibody;

<sup>8</sup> Pmel1\_T: Pmel-1 T cells (specific for gp100 melanoma antigen);

<sup>9</sup> NY-ESO-1<sup>+</sup>\_MART-1<sup>+</sup>\_T: CD8 T cells, which had been retrovirally transduced with a MART-1-specific and NY-ESO-1-specific T cell receptor (MART-1 T cells).

<sup>10</sup> MART-1\_T: CD8 T cells, which had been retrovirally transduced with a MART-1-specific T cell receptor (MART-1 T cells).

**Table S5. List of predictive gene expression signatures for immunotherapy**

| <b>Signatures</b>                   | <b>Algorithms</b>                                     | <b>Description</b>                                                                     |
|-------------------------------------|-------------------------------------------------------|----------------------------------------------------------------------------------------|
| Stem.Sig                            | Naïve Bayes                                           | Novel stemness signature identified by large-scale single cell RNA sequencing analysis |
| <b>Pan-cancer signatures</b>        |                                                       |                                                                                        |
| IFNG.Sig[48]                        | Average gene expression                               | An IFN-gamma-related profile that predicts PD-1blockade efficacy                       |
| T.cell.inflamed.Sig[48]             | Average gene expression                               | T-cell inflamed gene expression profiles                                               |
| PD-L1.Sig[49]                       | Expression of PD-L1                                   | Gene expression profiles of PD-L1 / PDCD1.                                             |
| LRRC15.CAF.Sig[50]                  | eigenWeightedMean*                                    | Gene expression signature of LRRC15 <sup>+</sup> Cancer associated fibroblast          |
| Cytotoxic.Sig[51]                   | Geometric mean of gene expression                     | Genes associated with cytotoxic activities                                             |
| NLRP3.Sig[52]                       | ssGSEA                                                | NLRP3 inflammasome-related genes derived from pan-cancer analysis                      |
| <b>Melanoma-specific signatures</b> |                                                       |                                                                                        |
| IMPRES.Sig[53]                      | Comparison of 15 gene pairs                           | Twenty-eight immune checkpoints genes that build Immuno-predictive scores (IMPRES).    |
| CRMA.Sig[54]                        | Geometric mean of gene expression                     | Genes of cancer-germline antigen that predicts the outcome of CTLA-4 blockade          |
| TcellExc.Sig[1]                     | Overall Expression                                    | Genes correlated with exclusion of T cells in the tumor microenvironment               |
| IPRES.Sig[55]                       | Mean z-scores of GSVA scores                          | 73 pathways involved with innate anti-PD-1 resistance (IPRES)                          |
| ImmuneCells.Sig[56]                 | Cancerclass                                           | Gene expression signature of TREM2hi macrophages and $\gamma\delta$ T cells            |
| TRS.Sig[57]                         | GSVA                                                  | a tumor-reactive T cell signature                                                      |
| IMS.Sig[58]                         | Ratio of IMS scores / INF- $\gamma$ scor <sup>#</sup> | Genes correlated with immunosuppression                                                |

\*A method provided by R package multiGSEA *v1.1.99*

<sup>#</sup>IMS scores = Average gene expression of 18 immunosuppression genes; INF- $\gamma$  scores = Average gene expression of 6 INF- $\gamma$  genes

**Table S6. Gene list of Stem.Sig.**

|            |          |          |           |          |            |           |          |          |           |           |            |          |            |            |          |
|------------|----------|----------|-----------|----------|------------|-----------|----------|----------|-----------|-----------|------------|----------|------------|------------|----------|
| ENO1       | RBM17    | RHCG     | H1FX      | UPF2     | C19orf12   | TXNDC5    | SERPINA1 | HNRNPH2  | PHB2      | LHX2      | NNAT       | CHCHD5   | FAM204A    | IFT20      | COPA     |
| UQCRH      | KRT1     | S100A7   | RYK       | RPP38    | NUDT19     | RNF11     | VPS35    | CEACAM6  | PTMA      | FOXG1     | AC018890.6 | CISD2    | PCBP2      | SMIM26     | ACKR1    |
| SERBP1     | MYL6     | GSDMC    | HIST1H2AE | MSRB2    | LRP3       | EEF2      | MTRNR2L1 | C18ORF32 | SELENOW   | CTDNEP1   | KCTD8      | SPINK1   | LECT1      | MMP24OS    | MADCAM1  |
| BCL10      | SLC25A3  | LY6D     | TPD52L1   | EIF5AL1  | LSM14A     | SUMO3     | SPHK1    | TMED5    | SLC25A6   | ALKBH5    | OOEP       | RENBP    | VRK1       | ABCA7      | FABP3    |
| DENND2C    | CNIH1    | CALML5   | PDCD2     | MARVELD1 | GPI        | SHC4      | HM13     | DERL2    | UBB       | PIPOX     | STEAP1B    | MRPL23   | CIB2       | PVR        | GPR137B  |
| S100A6     | SERF2    | DSG1     | NDUFA4    | LDHB     | GRAMD1A    | RRS1      | LBP      | VPS29    | YBX1      | TRIM47    | SLC26A3    | NTS      | PKMYT1     | SELENOM    | HTR2B    |
| JTB        | FEM1B    | KRTDAP   | NUPR2     | PFDN5    | SYNE4      | SND1      | MYDGF    | ATP5G2   | C11orf31  | SMOX      | MAMDC2     | CLN3     | RPA1       | DES11      | ZNF330   |
| LRRFIP2    | ALDOA    | CITED4   | SHFM1     | GTSF1    | FAM98C     | PRDX1     | C19orf70 | C9ORF78  | ATP5B     | C20orf24  | PLEKHA7    | PPP4C    | ALYREF     | PIGP       | EIF4EBP3 |
| TMA7       | PFN1     | ANKRD35  | ATP5J2    | PRSS27   | DYRK1B     | CFH       | UBA52    | POLR2E   | MID1IP1   | RNF126    | SIK3       | VCX2     | SF3A2      | UFD1L      | SNX8     |
| TMEM41A    | PSMB3    | NBPF14   | C7orf73   | TCEB2    | EGLN2      | C4BPA     | TMPRSS3  | ZFAND6   | KNG1      | SH3GL1    | GGACT      | ADAMTSL1 | ASF1B      | UBE2L3     | RGS20    |
| ATP5I      | KRT10    | MRPS21   | ARHGGEF35 | BCL7C    | AP2S1      | AGT       | RACK1    | COMMD8   | OMG       | RAD23A    | C14orf166  | DKK2     | DDA1       | EIF5A2     | MLANA    |
| H2AFZ      | H3F3B    | C1orf43  | FAM104B   | IRX3     | PIH1D1     | KYNU      | EIF3M    | EMC3     | SLC25A29  | SSBP4     | ALKBH7     | EIF2S3   | FUZ        | PNCK       | LRRN4CL  |
| UBE2D2     | ACTG1    | APOA1BP  | NGFRAP1   | IRX5     | UBE2S      | ATP5G3    | AGR2     | C5ORF15  | SNF8      | KXD1      | ZNF90      | EMX2     | PDXP       | PTHLH      | TM7SF3   |
| NPM1       | RIOK3    | TAGLN2   | VGLL1     | CALB2    | RBX1       | UGT2B15   | MTHFD2   | RBM3     | INAFM1    | CCDC106   | CDHR1      | EPHA3    | LMF2       | AC007325.4 | GNPTAB   |
| TUBB       | RALY     | PIGC     | SFRP1     | KIF1C    | DSCR8      | GC        | SUB1     | SET      | LINC00844 | IGSF21    | LMF1       | EPHA7    | NCAPH2     | AL353997.6 | ZNF106   |
| PERP       | TICAM1   | SNRPE    | ENY2      | C1QBP    | HNRNPA1    | PPIA      | C11ORF58 | SUMO2    | TXNL4A    | PLPPR5    | SHC3       | NTN5     | AC011043.1 | MIR205HG   | TSPAN10  |
| ACTB       | C19orf43 | PPP2R5A  | AARD      | TMEM256  | CHCHD2     | IGFBP1    | ERP29    | DERL1    | TMPRSS5   | FAM89A    | EHD2       | WIF1     | IGKC       | NECTIN1    | BIRC7    |
| AC090498.1 | TIAM1    | H3F3A    | SLURP1    | EIF4A1   | TSPYL5     | PON3      | TMED10   | GRTP1    | GLRX5     | GRID2     | POLE4      | CENPU    | SNORD100   | ECM1       | CLPTM1   |
| PLP2       | GRHL3    | C1orf131 | C8orf82   | KRT19    | AL365205.1 | MTRNR2L10 | RER1     | C6ORF62  | ATP5J     | GNB2L1    | POM121     | SMC2     | HOMER1     | C1orf56    | BAIAP2L2 |
| EFNB1      | PKP1     | CEBPZOS  | TPM2      | ATP5G1   | WDR77      | DIAPH2    | AP3S1    | CASP6    | ANKRD6    | KLRC2     | SERPINA3   | GTSE1    | CPEB4      | SPRR1B     |          |
| SLC25A5    | GPR87    | COX7A2L  | PRKCDBP   | NME1     | NDC1       | FGL1      | COPB1    | BECN1    | COX4I1    | NKD1      | STEAP3     | PCP4     | CDK13      | SPRR2D     |          |
| PDP1       | ADGRF4   | PEX13    | FTH1      | HN1      | FZD8       | TXN       | EEF1A1   | PSMF1    | PFKFB2    | CYP27B1   | GNB1       | HPCA     | TAC1       | SFTPB      |          |
| CDKN2A     | FAM83B   | TCF7L1   | EEF1G     | FAM110A  | TP53BP2    | ORM1      | FAU      | ANP32B   | CRYGS     | C1ORF61   | PARL       | TMEM18   | BEX5       | FABP6      |          |
| CDKN2B     | CALML3   | RPIA     | FAM89B    | SNRPB    | RSL1D1     | ORM2      | CCNDBP1  | ATP5F1B  | NUDT4     | CMTM5     | G6PD       | POU4F3   | TPH1       | MUC21      |          |
| UBAP1      | HCAR2    | FAHD2A   | CCS       | COMMD7   | EIF2S2     | C5        | AATF     | HINT1    | SPOCD1    | ATP23     | FAAP20     | NRM      | AGRN       | SLC22A31   |          |
| SEC61B     | ZNF750   | DBI      | DHCR7     | BPI      | DDOST      | GAPDH     | NOX1     | HNRNPD   | KCNF1     | TTC9B     | NR0B2      | UBE2A    | CGN        | MRPL54     |          |
| ZBTB43     | SERPINB2 | NAA50    | DGAT2     | PSMA7    | MKI67      | TPI1      | CHMP4A   | LYPLA1   | OSBPL6    | C1ORF122  | APH1A      | MCTS1    | SFTA2      | NAPSA      |          |
| PPP1CA     | TINCR    | ROPN1    | BARX2     | MRGBP    | AC012640.4 | COX6A1    | GSTA1    | MTRNR2L2 | MTHFD2L   | C17ORF89  | CRP        | IDH3G    | GCLC       | AL031727.1 |          |
| GSTP1      | IL36G    | ROPN1B   | ZMYND11   | POP4     | PRDX3      | RAN       | GTF3A    | NACA     | ARSJ      | LINC01268 | APOA2      | TIMM23   | FAM83A     | QARS       |          |

**Table S7. Comparison of AUC of previous signatures in testing cohort.**

| <b>Pan-cancer signatures</b>        | <b>Testing Cohort</b>                 | Hugo 2016 SKCM | Van 2015 SKCM | Kim 2018 GC | Zhao 2019 GBM | Synder 2017 UC |
|-------------------------------------|---------------------------------------|----------------|---------------|-------------|---------------|----------------|
| <b>Stem.Sig</b>                     | 0.71                                  | 0.66           | 0.81          | 0.69        | 0.62          | 0.8            |
| INFG.Sig                            | 0.66                                  | 0.53           | 0.67          | 0.85        | 0.53          | 0.54           |
| T.cell.inflamed.Sig                 | 0.65                                  | 0.57           | 0.73          | 0.78        | 0.51          | 0.6            |
| PDL1.Sig                            | 0.62                                  | 0.52           | 0.69          | 0.79        | 0.46          | 0.51           |
| LRRC15.CAF.Sig                      | 0.6                                   | 0.6            | 0.52          | 0.55        | 0.63          | 0.81           |
| NLRP3.Sig                           | 0.6                                   | 0.46           | 0.67          | 0.62        | 0.74          | 0.46           |
| Cytotoxic.Sig                       | 0.44                                  | 0.43           | 0.29          | 0.77        | 0.57          | 0.49           |
| <b>Melanoma-specific signatures</b> |                                       |                |               |             |               |                |
|                                     | <b>SKCM<br/>(Hugo2016 + Van 2015)</b> |                |               |             |               |                |
| IMPRES.Sig                          | 0.81                                  |                |               |             |               |                |
| CRMA.Sig                            | 0.77                                  |                |               |             |               |                |
| <b>Stem.Sig</b>                     | 0.76                                  |                |               |             |               |                |
| TcellExc.Sig                        | 0.68                                  |                |               |             |               |                |
| IPRES.Sig                           | 0.66                                  |                |               |             |               |                |
| ImmunCells.Sig                      | 0.62                                  |                |               |             |               |                |
| TRS.Sig                             | 0.57                                  |                |               |             |               |                |
| IMS.Sig                             | 0.53                                  |                |               |             |               |                |



## Reference

1. Jerby-Arnon L, Shah P, Cuoco MS, Rodman C, Su M-J, Melms JC, et al. A Cancer Cell Program Promotes T Cell Exclusion and Resistance to Checkpoint Blockade. *Cell*. 2018;175:984-997.e24. <https://doi.org/10.1016/j.cell.2018.09.006>
2. Yost KE, Satpathy AT, Wells DK, Qi Y, Wang C, Kageyama R, et al. Clonal replacement of tumor-specific T cells following PD-1 blockade. *Nat Med*. 2019;25:1251–9. <https://doi.org/10.1038/s41591-019-0522-3>
3. Wang L, Dai J, Han R-R, Dong L, Feng D, Zhu G, et al. Single-Cell Map of Diverse Immune Phenotypes in the Metastatic Brain Tumor Microenvironment of Non Small Cell Lung Cancer. *bioRxiv*. 2019; <https://doi.org/10.1101/2019.12.30.890517>
4. Kim C, Gao R, Sei E, Brandt R, Hartman J, Hatschek T, et al. Chemoresistance Evolution in Triple-Negative Breast Cancer Delineated by Single-Cell Sequencing. *Cell*. 2018;173:879-893.e13. <https://doi.org/10.1016/j.cell.2018.03.041>
5. Ma L, Hernandez MO, Zhao Y, Mehta M, Tran B, Kelly M, et al. Tumor Cell Biodiversity Drives Microenvironmental Reprogramming in Liver Cancer. *Cancer Cell*. 2019;36:418-430.e6. <https://doi.org/10.1016/j.ccell.2019.08.007>
6. Zhang L, Li Z, Skrzypczynska KM, Fang Q, Zhang W, O'Brien SA, et al. Single-Cell Analyses Inform Mechanisms of Myeloid-Targeted Therapies in Colon Cancer. *Cell*. 2020;181:442-459.e29. <https://doi.org/10.1016/j.cell.2020.03.048>
7. Filbin MG, Tirosh I, Hovestadt V, Shaw ML, Escalante LE, Mathewson ND, et al. Developmental and oncogenic programs in H3K27M gliomas dissected by single-cell RNA-seq. *Science*. 2018;360:331–5. <https://doi.org/10.1126/science.aao4750>
8. Yuan J, Levitin HM, Frattini V, Bush EC, Boyett DM, Samanamud J, et al. Single-cell transcriptome analysis of lineage diversity in high-grade glioma. *Genome Med*. 2018;10:1–15. <https://doi.org/10.1186/s13073-018-0567-9>
9. Neftel C, Laffy J, Filbin MG, Hara T, Shore ME, Rahme GJ, et al. An Integrative Model of Cellular States, Plasticity, and Genetics for Glioblastoma. *Cell*. 2019;178:835-849.e21. <https://doi.org/10.1016/j.cell.2019.06.024>
10. Wang L, Babikir H, Müller S, Yagnik G, Shamardani K, Catalan F, et al. The phenotypes of proliferating glioblastoma cells reside on a single axis of variation. *Cancer Discov*. 2019;9:1708–19. <https://doi.org/10.1158/2159-8290.CD-19-0329>
11. Wang R, Sharma R, Shen X, Laughney AM, Funato K, Clark PJ, et al. Adult Human Glioblastomas Harbor Radial Glia-like Cells. *Stem Cell Reports*. 2020;14:338–50. <https://doi.org/10.1016/j.stemcr.2020.01.007>
12. Wang L, Catalan F, Shamardani K, Babikir H, Diaz A. Ensemble learning for classifying single-cell data and projection across reference atlases. *Bioinformatics*. 2020;36:3585–7. <https://doi.org/10.1093/bioinformatics/btaa137>
13. Zhao W, Dovas A, Spinazzi EF, Levitin HM, Banu MA, Upadhyayula P, et al. Deconvolution of cell type-specific drug responses in human tumor tissue with single-cell RNA-seq. *Genome Med*. 2021;13. <https://doi.org/10.1186/s13073-021-00894-y>
14. Tirosh I, Venteicher AS, Hebert C, Escalante LE, Patel AP, Yizhak K, et al. Single-cell RNA-seq

- supports a developmental hierarchy in human oligodendroglioma. *Nature*. 2016;539:309–13. <https://doi.org/10.1038/nature20123>
15. Darmanis S, Sloan SA, Croote D, Mignardi M, Chernikova S, Samghababi P, et al. Single-Cell RNA-Seq Analysis of Infiltrating Neoplastic Cells at the Migrating Front of Human Glioblastoma. *Cell Rep*. 2017;21:1399–410. <https://doi.org/10.1016/j.celrep.2017.10.030>
  16. Venteicher AS, Tirosh I, Hebert C, Yizhak K, Neftel C, Filbin MG, et al. Decoupling genetics, lineages, and microenvironment in IDH-mutant gliomas by single-cell RNA-seq. *Science*. 2017;355. <https://doi.org/10.1126/science.aai8478>
  17. Puram S V., Tirosh I, Parikh AS, Patel AP, Yizhak K, Gillespie S, et al. Single-Cell Transcriptomic Analysis of Primary and Metastatic Tumor Ecosystems in Head and Neck Cancer. *Cell*. 2017;171:1611-1624.e24. <https://doi.org/10.1016/j.cell.2017.10.044>
  18. Hovestadt V, Smith KS, Bihannic L, Filbin MG, Shaw MKL, Baumgartner A, et al. Resolving medulloblastoma cellular architecture by single-cell genomics. *Nature*. 2019;572:74–9. <https://doi.org/10.1038/s41586-019-1434-6>
  19. Paulson KG, Voillet V, McAfee MS, Hunter DS, Wagener FD, Perdicchio M, et al. Acquired cancer resistance to combination immunotherapy from transcriptional loss of class I HLA. *Nat Commun*. 2018;9. <https://doi.org/10.1038/s41467-018-06300-3>
  20. Ledergor G, Weiner A, Zada M, Wang SY, Cohen YC, Gatt ME, et al. Single cell dissection of plasma cell heterogeneity in symptomatic and asymptomatic myeloma [Internet]. *Nat. Med*. 2018. <https://doi.org/10.1038/s41591-018-0269-2>
  21. Rao M, Oh K, Moffitt R, Thompson P, Li J, Liu J. Comparative scRNA-seq Reveals Liver Metastasis-Specific Targets in a Patient with Small Intestinal Neuroendocrine Cancer Running title : Comparative scRNA-seq of a Patient ' s Metastatic Cancer.
  22. Lambrechts D, Wauters E, Boeckx B, Aibar S, Nittner D, Burton O, et al. Phenotype molding of stromal cells in the lung tumor microenvironment. *Nat Med*. 2018;24:1277–89. <https://doi.org/10.1038/s41591-018-0096-5>
  23. Song Q, Hawkins GA, Wudel L, Chou PC, Forbes E, Pullikuth AK, et al. Dissecting intratumoral myeloid cell plasticity by single cell RNA-seq. *Cancer Med*. 2019;8:3072–85. <https://doi.org/10.1002/cam4.2113>
  24. Zilionis R, Engblom C, Pfirschke C, Savova V, Zemmour D, Saatcioglu HD, et al. Single-Cell Transcriptomics of Human and Mouse Lung Cancers Reveals Conserved Myeloid Populations across Individuals and Species. *Immunity*. 2019;50:1317-1334.e10. <https://doi.org/10.1016/j.immuni.2019.03.009>
  25. Shih AJ, Menzin A, Whyte J, Lovecchio J, Liew A, Khalili H, et al. Correction: Identification of grade and origin specific cell populations in serous epithelial ovarian cancer by single cell RNA-seq (PLoS ONE (2018) 13: 11 (e0206785) DOI: 10.1371/journal.pone.0206785). *PLoS One*. 2018;13:1–17. <https://doi.org/10.1371/journal.pone.0208778>
  26. Peng J, Sun BF, Chen CY, Zhou JY, Chen YS, Chen H, et al. Single-cell RNA-seq highlights intra-tumoral heterogeneity and malignant progression in pancreatic ductal adenocarcinoma. *Cell Res*. 2019;29:725–38. <https://doi.org/10.1038/s41422-019-0195-y>
  27. Moncada R, Barkley D, Wagner F, Chiodin M, Devlin JC, Baron M, et al. Integrating microarray-based spatial transcriptomics and single-cell RNA-seq reveals tissue architecture in

pancreatic ductal adenocarcinomas. *Nat Biotechnol.* 2020;38:333–42.  
<https://doi.org/10.1038/s41587-019-0392-8>

28. Tirosh I, Izar B, Prakadan SM, Wadsworth MH, Treacy D, Trombetta JJ, et al. Dissecting the multicellular ecosystem of metastatic melanoma by single-cell RNA-seq. *Science.* 2016;352:189–96.  
<https://doi.org/10.1126/science.aad0501>

29. Zhang P, Yang M, Zhang Y, Xiao S, Lai X, Tan A, et al. Dissecting the Single-Cell Transcriptome Network Underlying Gastric Premalignant Lesions and Early Gastric Cancer. *Cell Rep.* 2019;27:1934-1947.e5. <https://doi.org/10.1016/j.celrep.2019.04.052>

30. Durante MA, Rodriguez DA, Kurtenbach S, Kuznetsov JN, Sanchez MI, Decatur CL, et al. Single-cell analysis reveals new evolutionary complexity in uveal melanoma. *Nat Commun.* 2020;11. <https://doi.org/10.1038/s41467-019-14256-1>

31. Braun DA, Hou Y, Bakouny Z, Ficial M, Sant' Angelo M, Forman J, et al. Interplay of somatic alterations and immune infiltration modulates response to PD-1 blockade in advanced clear cell renal cell carcinoma. *Nat Med.* 2020;26:909–18. <https://doi.org/10.1038/s41591-020-0839-y>

32. Mariathasan S, Turley SJ, Nickles D, Castiglioni A, Yuen K, Wang Y, et al. TGF $\beta$  attenuates tumour response to PD-L1 blockade by contributing to exclusion of T cells. *Nature.* 2018;554:544–8.  
<https://doi.org/10.1038/nature25501>

33. Liu D, Schilling B, Liu D, Sucker A, Livingstone E, Jerby-amon L, et al. Integrative molecular and clinical modeling of clinical outcomes to PD1 blockade in patients with metastatic melanoma. *Nat Med.* 2019;25. <https://doi.org/10.1038/s41591-019-0654-5>

34. Gide TN, Quek C, Menzies AM, Tasker AT, Shang P, Holst J, et al. Distinct Immune Cell Populations Define Response to Anti-PD-1 Monotherapy and Anti-PD-1/Anti-CTLA-4 Combined Therapy. *Cancer Cell.* 2019;35:238-255.e6. <https://doi.org/10.1016/j.ccell.2019.01.003>

35. Riaz N, Havel JJ, Makarov V, Desrichard A, Urba WJ, Sims JS, et al. Tumor and Microenvironment Evolution during Immunotherapy with Nivolumab. *Cell.* 2017;171:934-949.e16.  
<https://doi.org/10.1016/j.cell.2017.09.028>

36. Zhao J, Chen AX, Gartrell RD, Silverman AM, Aparicio L, Chu T, et al. Immune and genomic correlates of response to anti-PD-1 immunotherapy in glioblastoma. *Nat Med.* 2019;25:462–9.  
<https://doi.org/10.1038/s41591-019-0349-y>

37. Snyder A, Nathanson T, Funt SA, Ahuja A, Buros Novik J, Hellmann MD, et al. Contribution of systemic and somatic factors to clinical response and resistance to PD-L1 blockade in urothelial cancer: An exploratory multi-omic analysis. Minna JD, editor. *PLOS Med.* 2017;14:e1002309.  
<https://doi.org/10.1371/journal.pmed.1002309>

38. Hugo W, Zaretsky JM, Sun L, Song C, Moreno BH, Hu-Lieskovan S, et al. Genomic and Transcriptomic Features of Response to Anti-PD-1 Therapy in Metastatic Melanoma. *Cell.* 2016;165:35–44. <https://doi.org/10.1016/j.cell.2016.02.065>

39. Van Allen EM, Miao D, Schilling B, Shukla SA, Blank C, Zimmer L, et al. Erratum for the Report “Genomic correlates of response to CTLA-4 blockade in metastatic melanoma” by E. M. Van Allen, D. Miao, B. Schilling, S. A. Shukla, C. Blank, L. Zimmer, A. Sucker, U. Hillen, M. H. Geukes Foppen, S. M. Goldinger, J. Utikal, J. C. Ha. *Science.* 2016;352:aaf8264–aaf8264.  
<https://doi.org/10.1126/science.aaf8264>

40. Kim ST, Cristescu R, Bass AJ, Kim K-M, Odegaard JI, Kim K, et al. Comprehensive molecular

- characterization of clinical responses to PD-1 inhibition in metastatic gastric cancer. *Nat Med*. 2018;24:1449–58. <https://doi.org/10.1038/s41591-018-0101-z>
41. Freeman AJ, Vervoort SJ, Ramsbottom KM, Kelly MJ, Michie J, Pijpers L, et al. Natural Killer Cells Suppress T Cell-Associated Tumor Immune Evasion. *Cell Rep*. 2019;28:2784-2794.e5. <https://doi.org/10.1016/j.celrep.2019.08.017>
42. Kearney CJ, Vervoort SJ, Hogg SJ, Ramsbottom KM, Freeman AJ, Lalaoui N, et al. Tumor immune evasion arises through loss of TNF sensitivity. *Sci Immunol*. 2018;3:eaar3451. <https://doi.org/10.1126/sciimmunol.aar3451>
43. Manguso RT, Pope HW, Zimmer MD, Brown FD, Yates KB, Miller BC, et al. In vivo CRISPR screening identifies Ptpn2 as a cancer immunotherapy target. *Nature*. 2017;547:413–8. <https://doi.org/10.1038/nature23270>
44. Pan D, Kobayashi A, Jiang P, Ferrari de Andrade L, Tay RE, Luoma AM, et al. A major chromatin regulator determines resistance of tumor cells to T cell-mediated killing. *Science*. 2018;359:770–5. <https://doi.org/10.1126/science.aao1710>
45. Patel SJ, Sanjana NE, Kishton RJ, Eidizadeh A, Vodnala SK, Cam M, et al. Identification of essential genes for cancer immunotherapy. *Nature*. 2017;548:537–42. <https://doi.org/10.1038/nature23477>
46. Vredevoogd DW, Kuilman T, Ligtenberg MA, Boshuizen J, Stecker KE, de Bruijn B, et al. Augmenting Immunotherapy Impact by Lowering Tumor TNF Cytotoxicity Threshold. *Cell*. 2019;178:585-599.e15. <https://doi.org/10.1016/j.cell.2019.06.014>
47. Lawson KA, Sousa CM, Zhang X, Kim E, Akthar R, Caumanns JJ, et al. Functional genomic landscape of cancer-intrinsic evasion of killing by T cells. *Nature*. 2020;586:120–6. <https://doi.org/10.1038/s41586-020-2746-2>
48. Ayers M, Lunceford J, Nebozhyn M, Murphy E, Loboda A, Kaufman DR, et al. IFN- $\gamma$ -related mRNA profile predicts clinical response to PD-1 blockade. *J Clin Invest*. 2017;127:2930–40. <https://doi.org/10.1172/JCI91190>
49. Topalian SL, Hodi FS, Brahmer JR, Gettinger SN, Smith DC, McDermott DF, et al. Safety, Activity, and Immune Correlates of Anti-PD-1 Antibody in Cancer. *N Engl J Med*. 2012;366:2443–54. <https://doi.org/10.1056/nejmoa1200690>
50. Dominguez CX, Müller S, Keerthivasan S, Koeppen H, Hung J, Gierke S, et al. Single-Cell RNA Sequencing Reveals Stromal Evolution into LRRC15 + Myofibroblasts as a Determinant of Patient Response to Cancer Immunotherapy. *Cancer Discov*. 2020;10:232–53. <https://doi.org/10.1158/2159-8290.CD-19-0644>
51. Rooney MS, Shukla SA, Wu CJ, Getz G, Hacohen N. Molecular and genetic properties of tumors associated with local immune cytolytic activity. *Cell*. 2015;160:48–61. <https://doi.org/10.1016/j.cell.2014.12.033>
52. Ju M, Bi J, Wei Q, Jiang L, Guan Q, Zhang M, et al. Pan-cancer analysis of NLRP3 inflammasome with potential implications in prognosis and immunotherapy in human cancer. *Brief Bioinform*. 2020;00:1–16. <https://doi.org/10.1093/bib/bbaa345>
53. Auslander N, Zhang G, Lee JS, Frederick DT, Miao B, Moll T, et al. Robust prediction of response to immune checkpoint blockade therapy in metastatic melanoma. *Nat Med*. 2018;24:1545–9. <https://doi.org/10.1038/s41591-018-0157-9>

54. Shukla SA, Bachireddy P, Schilling B, Galonska C, Zhan Q, Bango C, et al. Cancer-Germline Antigen Expression Discriminates Clinical Outcome to CTLA-4 Blockade. *Cell*. 2018;173:624-633.e8. <https://doi.org/10.1016/j.cell.2018.03.026>
55. Hugo W, Zaretsky JM, Sun L, Johnson DB, Ribas A, Lo RS, et al. Genomic and Transcriptomic Features of Response to Anti-PD-1 Therapy in Metastatic Melanoma Article Genomic and Transcriptomic Features of Response to Anti-PD-1 Therapy in Metastatic Melanoma. *Cell*. 2016;1–10. <https://doi.org/10.1016/j.cell.2016.02.065>
56. Xiong D, Wang Y, You M. A gene expression signature of TREM2hi macrophages and  $\gamma\delta$  T cells predicts immunotherapy response. *Nat Commun*. 2020;11:1–12. <https://doi.org/10.1038/s41467-020-18546-x>
57. Yan M, Hu J, Ping Y, Xu L, Liao G, Jiang Z, et al. Single-Cell Transcriptomic Analysis Reveals a Tumor-Reactive T Cell Signature Associated With Clinical Outcome and Immunotherapy Response In Melanoma. *Front Immunol*. 2021;12:1–14. <https://doi.org/10.3389/fimmu.2021.758288>
58. Cui C, Xu C, Yang W, Chi Z, Sheng X, Si L, et al. Ratio of the interferon- $\gamma$  signature to the immunosuppression signature predicts anti-PD-1 therapy response in melanoma. *npj Genomic Med*. 2021;6:7. <https://doi.org/10.1038/s41525-021-00169-w>
