# Supplementary material for: Integrated analysis of single-cell and bulk RNA sequencing data reveals a pan-cancer stemness signature predicting immunotherapy response
Source: PubMed Central journal article supplement (PMC9052621; doi:10.1186/s13073-022-01050-w), 2022-04-29
Supplement: 13073_2022_1050_MOESM2_ESM.pdf [file 13073_2022_1050_MOESM2_ESM.pdf]

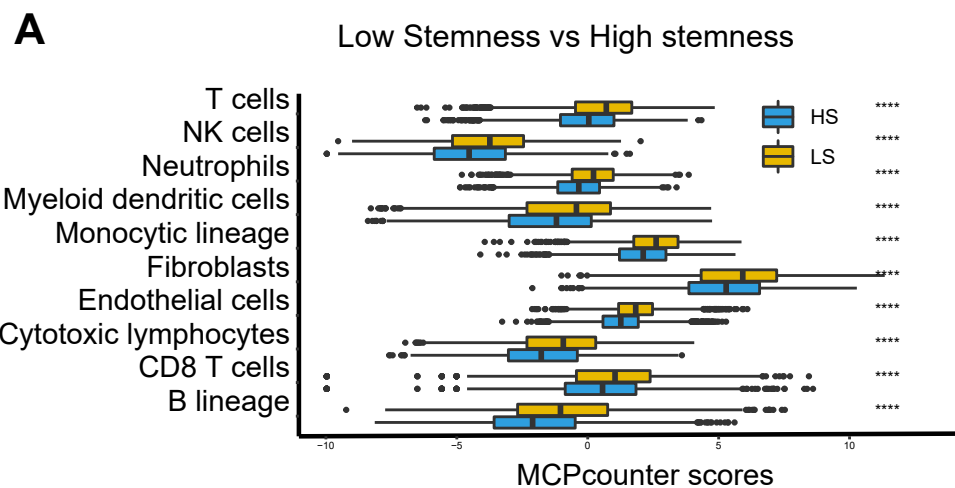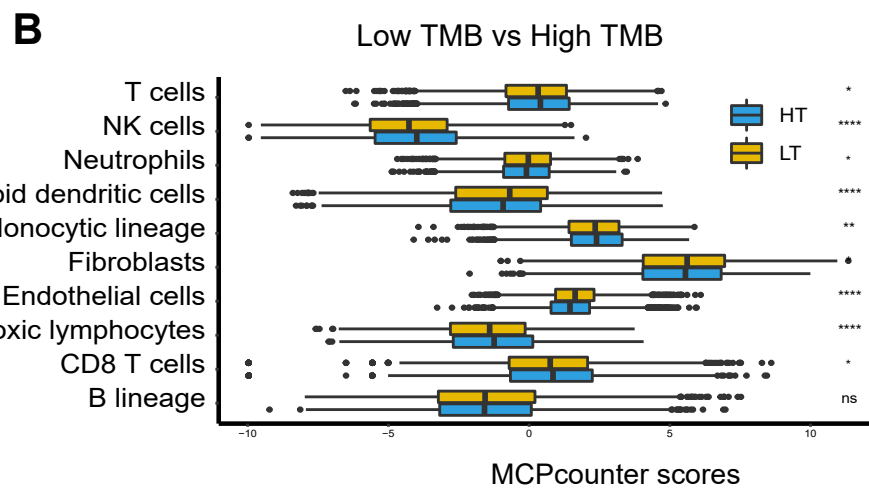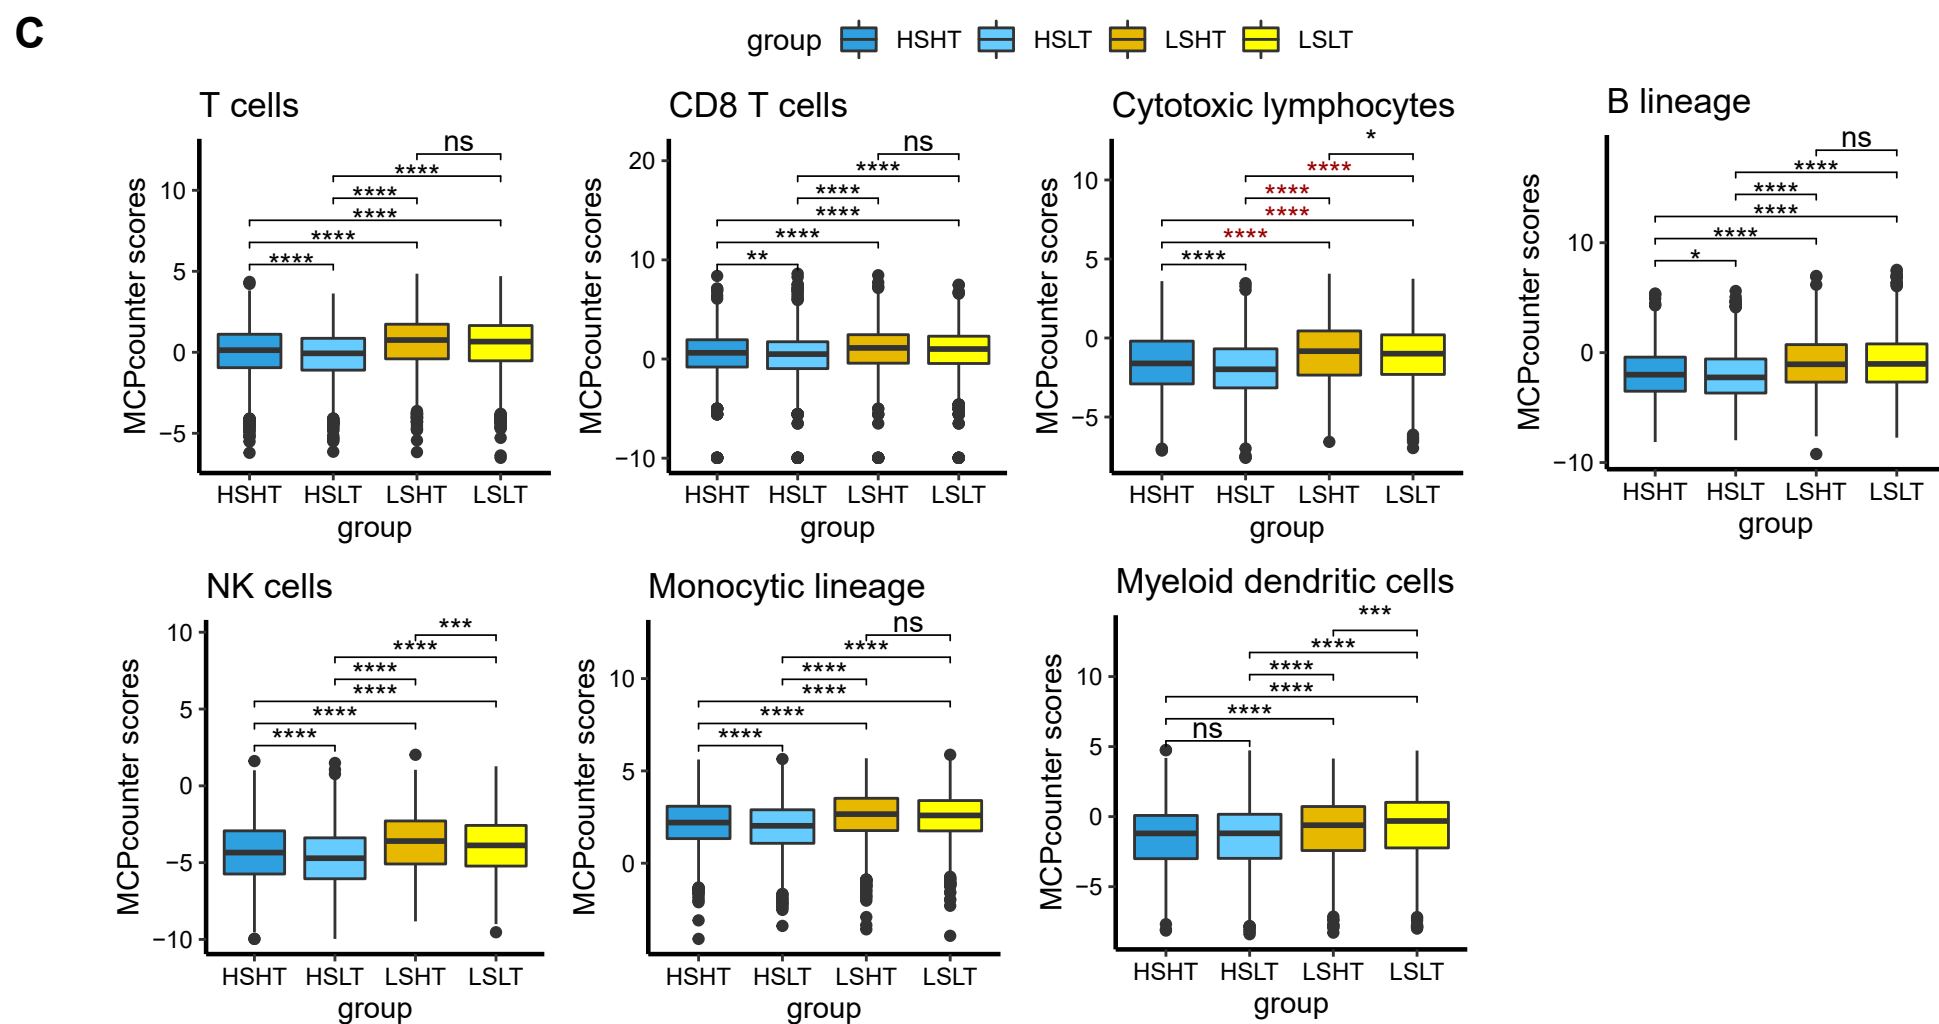

**Figure S1. Boxplots depicting the correlation of immune cells infiltration with Stem.Sig and TMB. (Mann-Whitney U test; ns, not significant; \*P < 0.05, \*\*P < 0.01, \*\*\*P < 0.001, \*\*\*\*P < 0.0001)**

**A**

Hugo 2016 SKCM

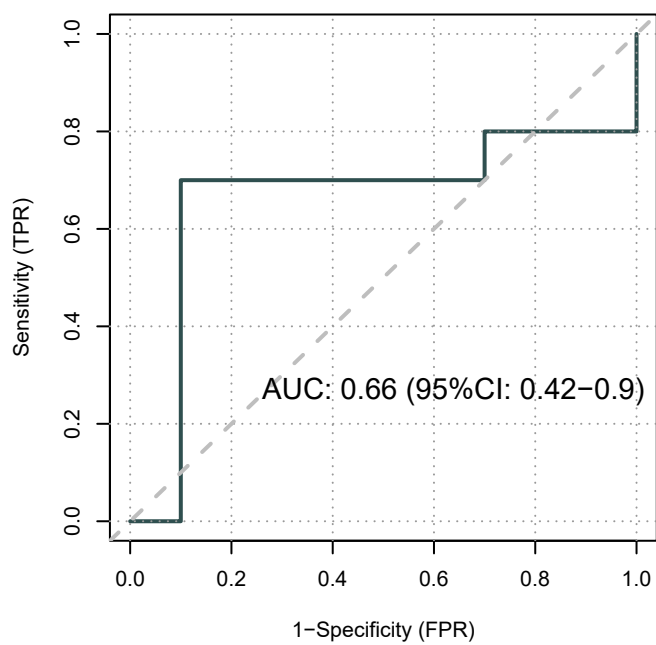

Van 2015 SKCM

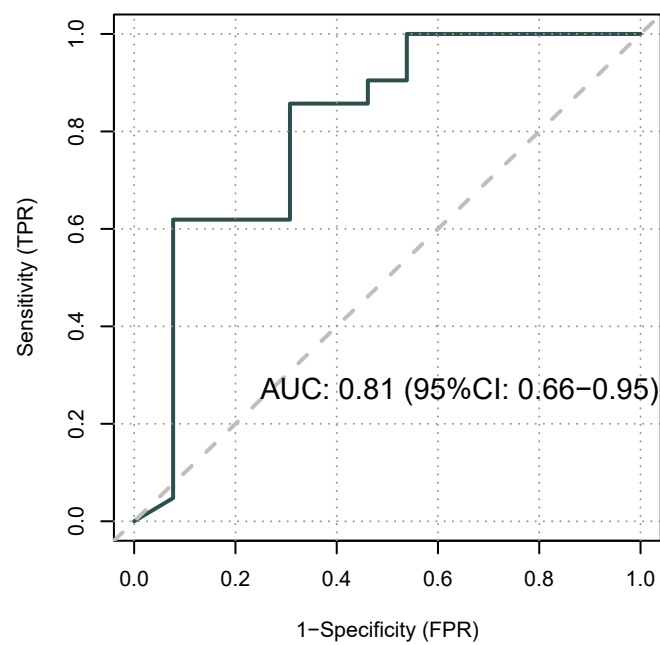

Kim 2018 GC

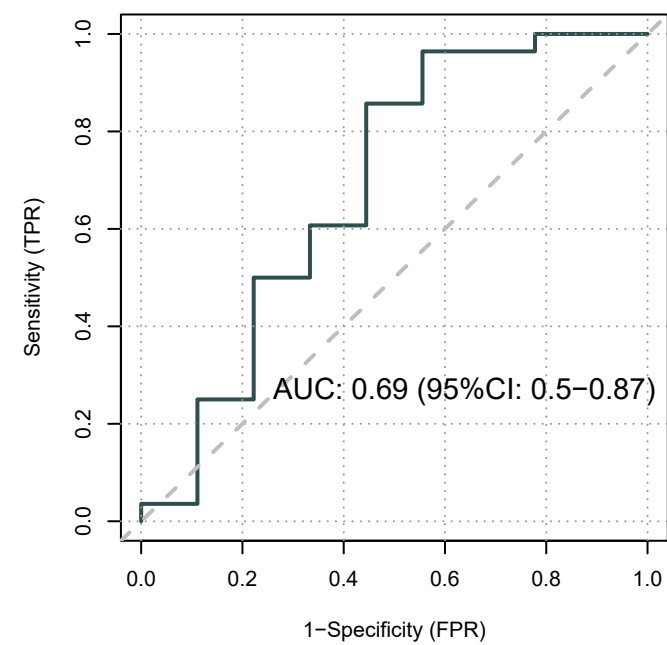

Zhao 2019 GBM

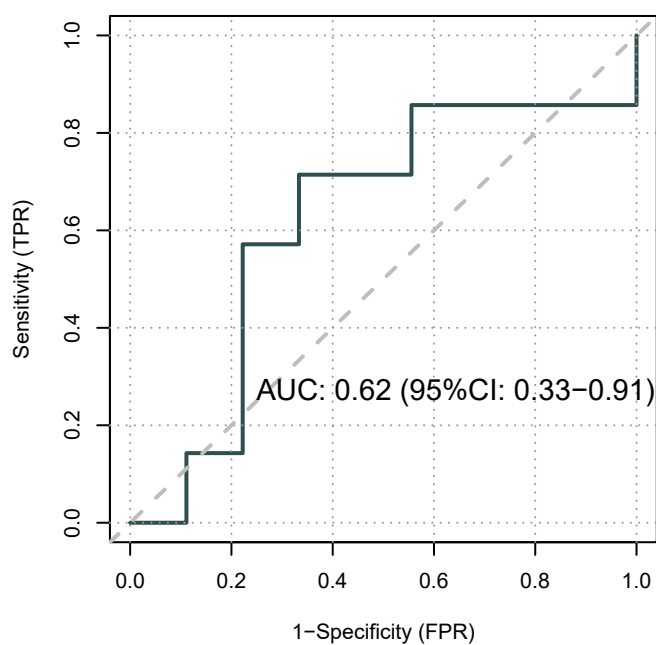

Snyder 2017 UC

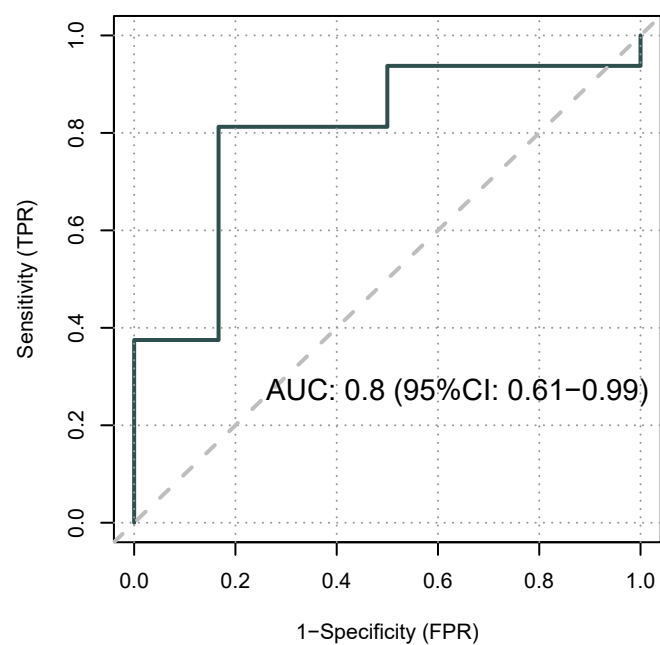**B**

Hugo 2016 SKCM

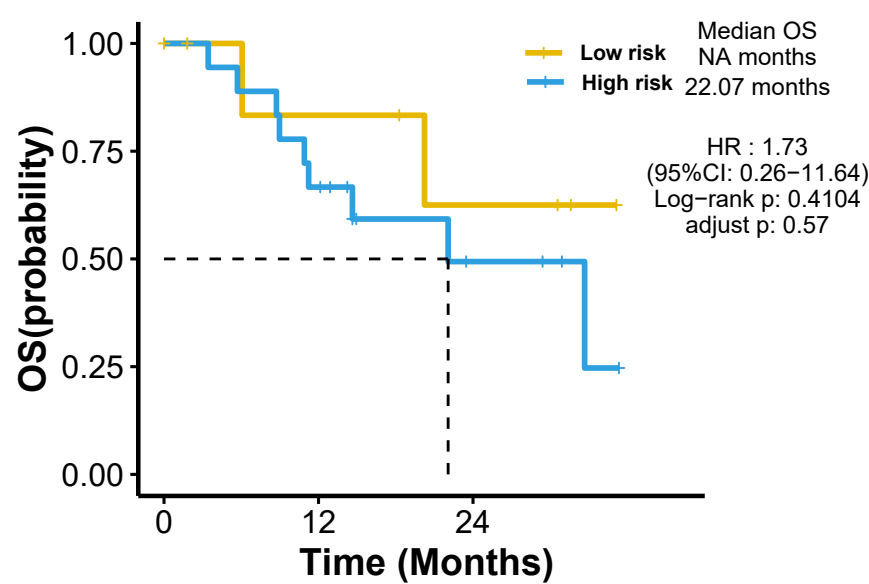

Van 2015 SKCM

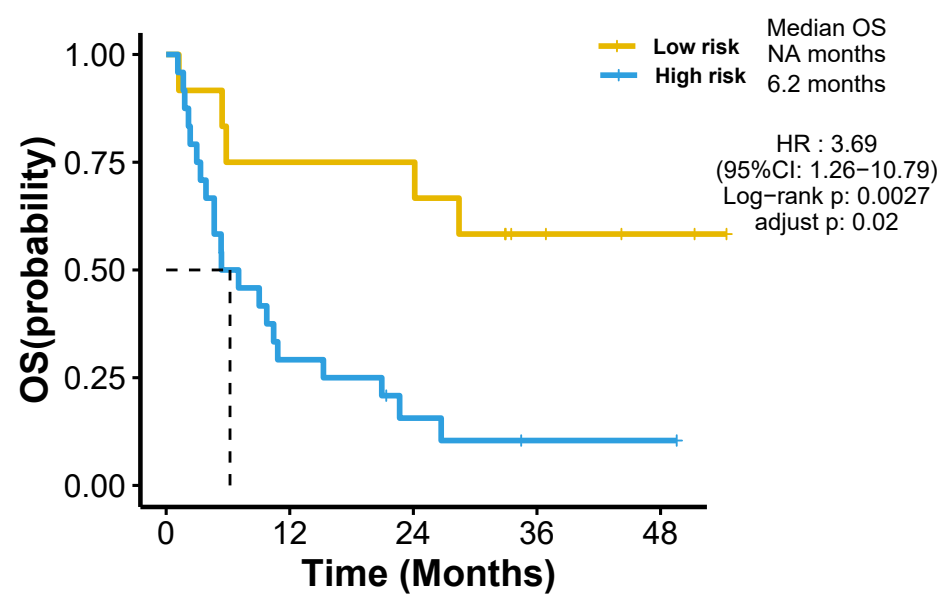

Zhao 2019 GBM

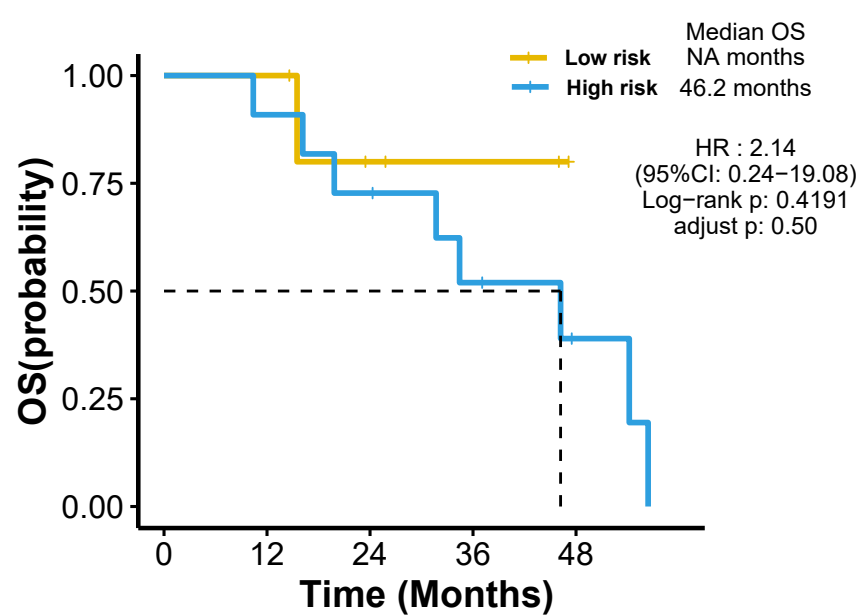

Snyder 2017 UC

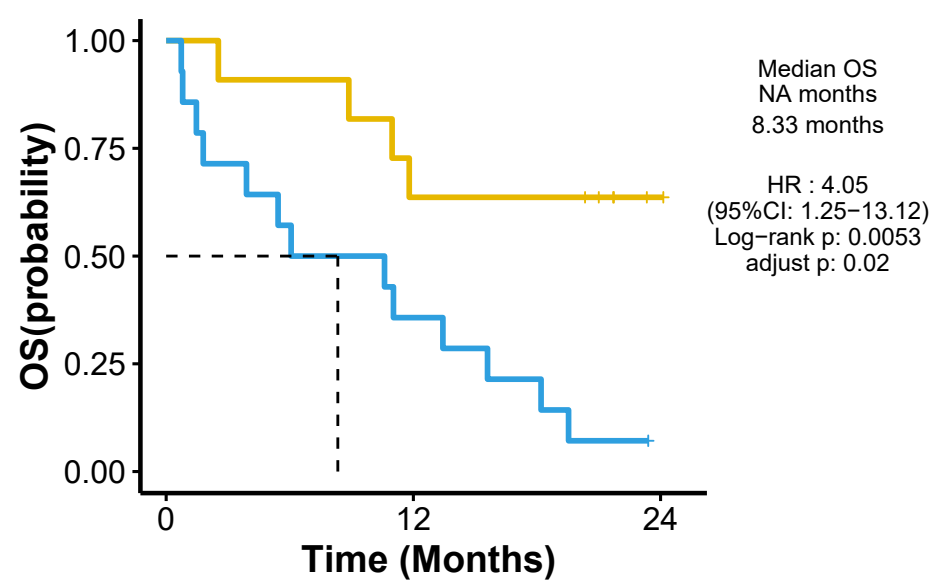

**Figure S2. Subgroup analysis of testing set. A. ROC depicting the performance of Stem.Sig individual testing cohort. B. Kaplan-Meier survival plots of individual testing cohort.**

**A**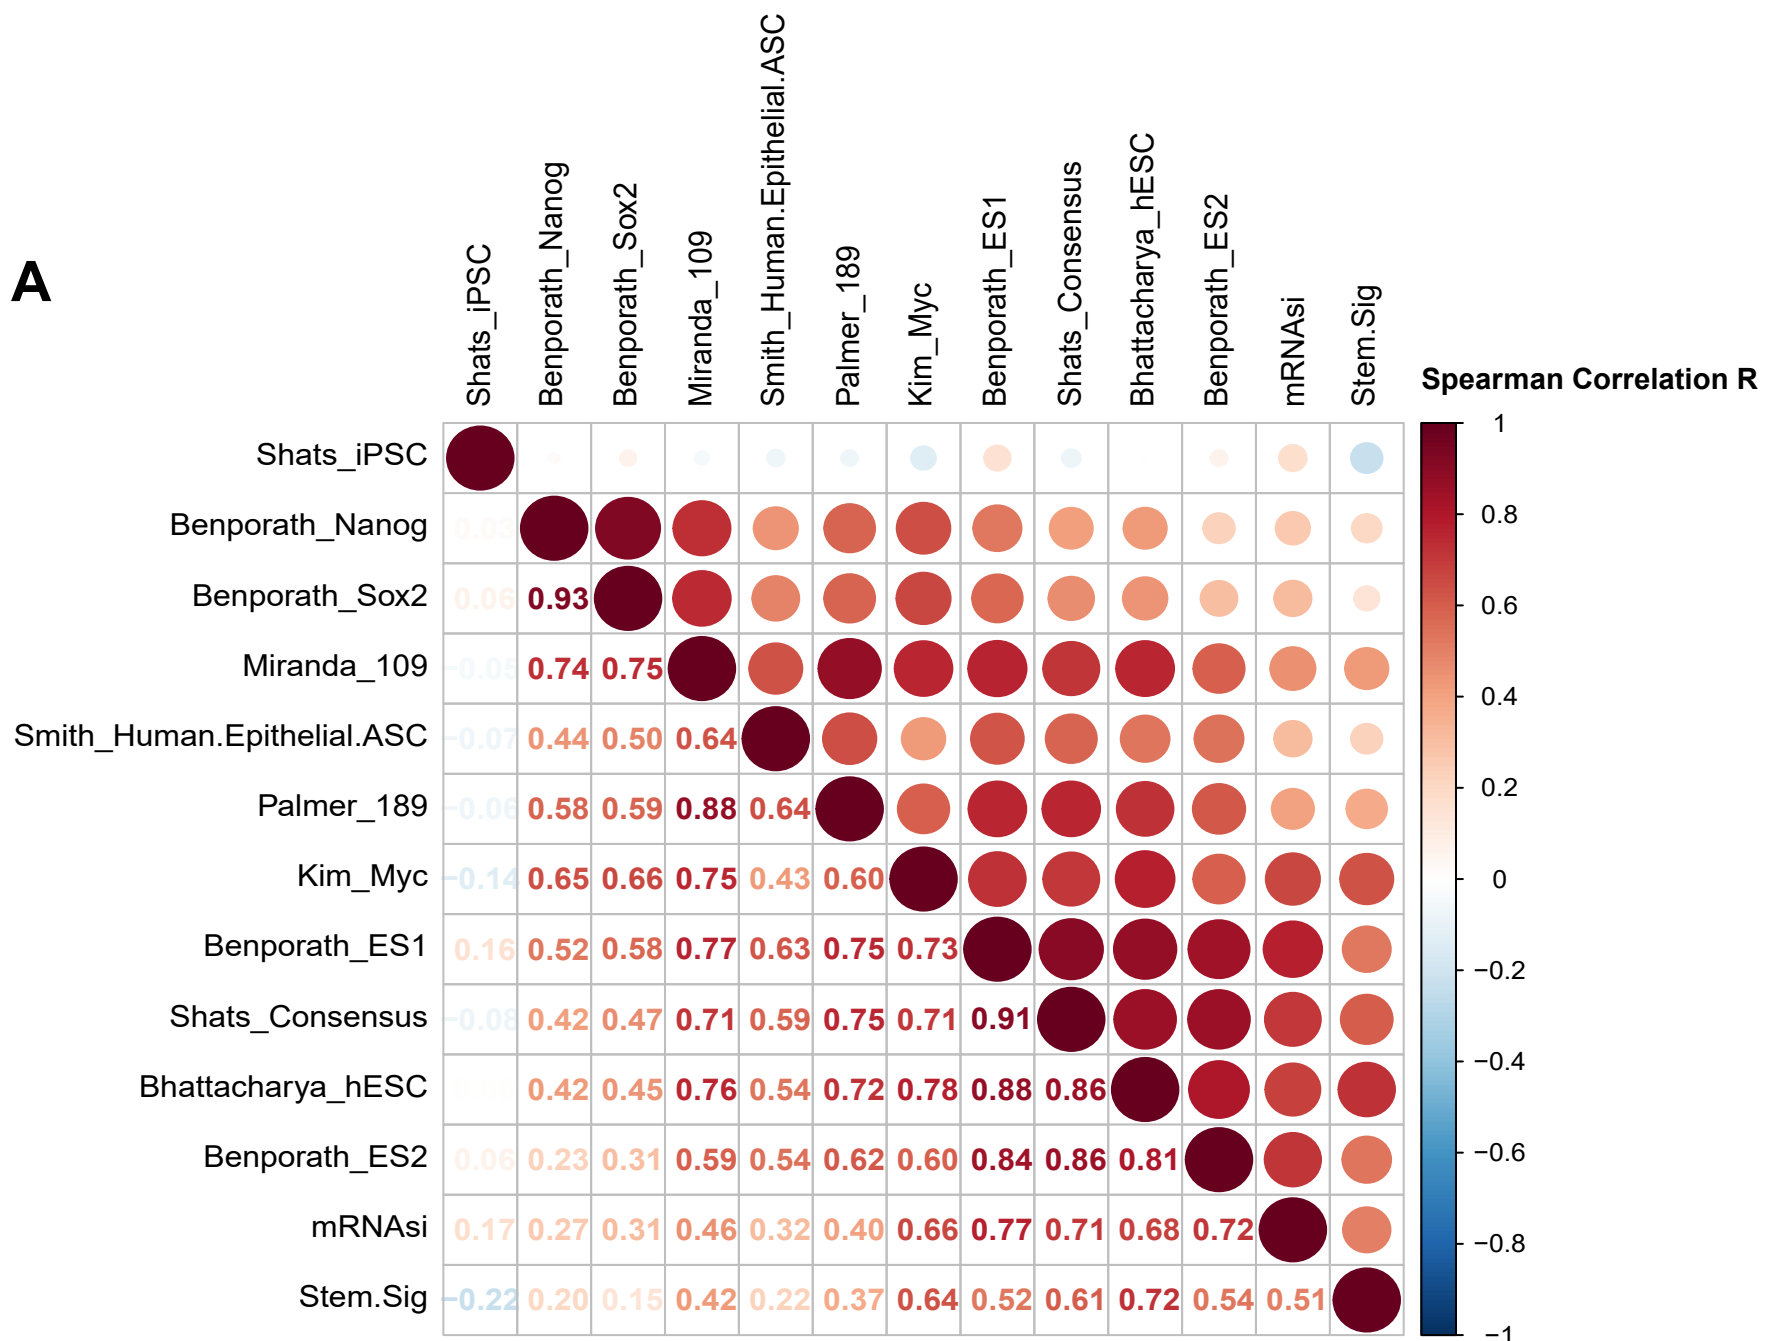**B**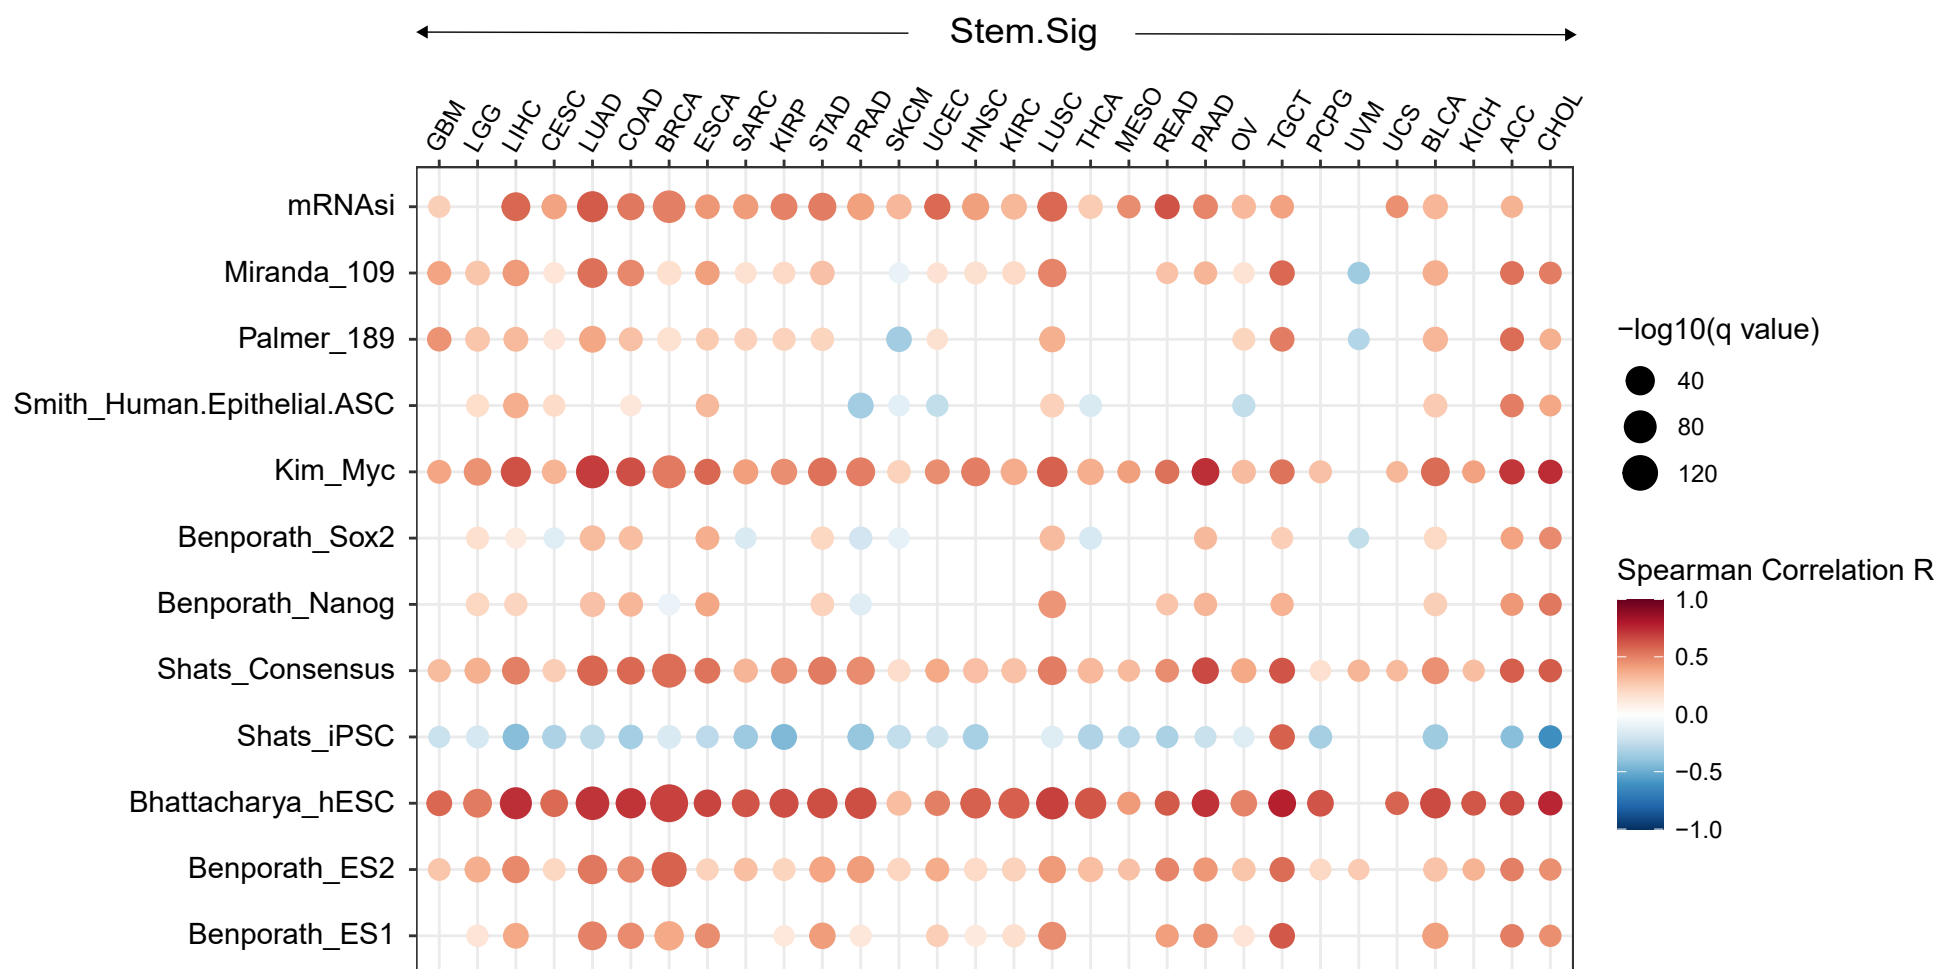

**Figure S3. Correlation plot of Stem.Sig and other stemness signatures.** Stem.Sig positively associated with all stemness signatures except Shats\_iPSC, which does not show significantly positive correlation with any other stemness signature[1–6].

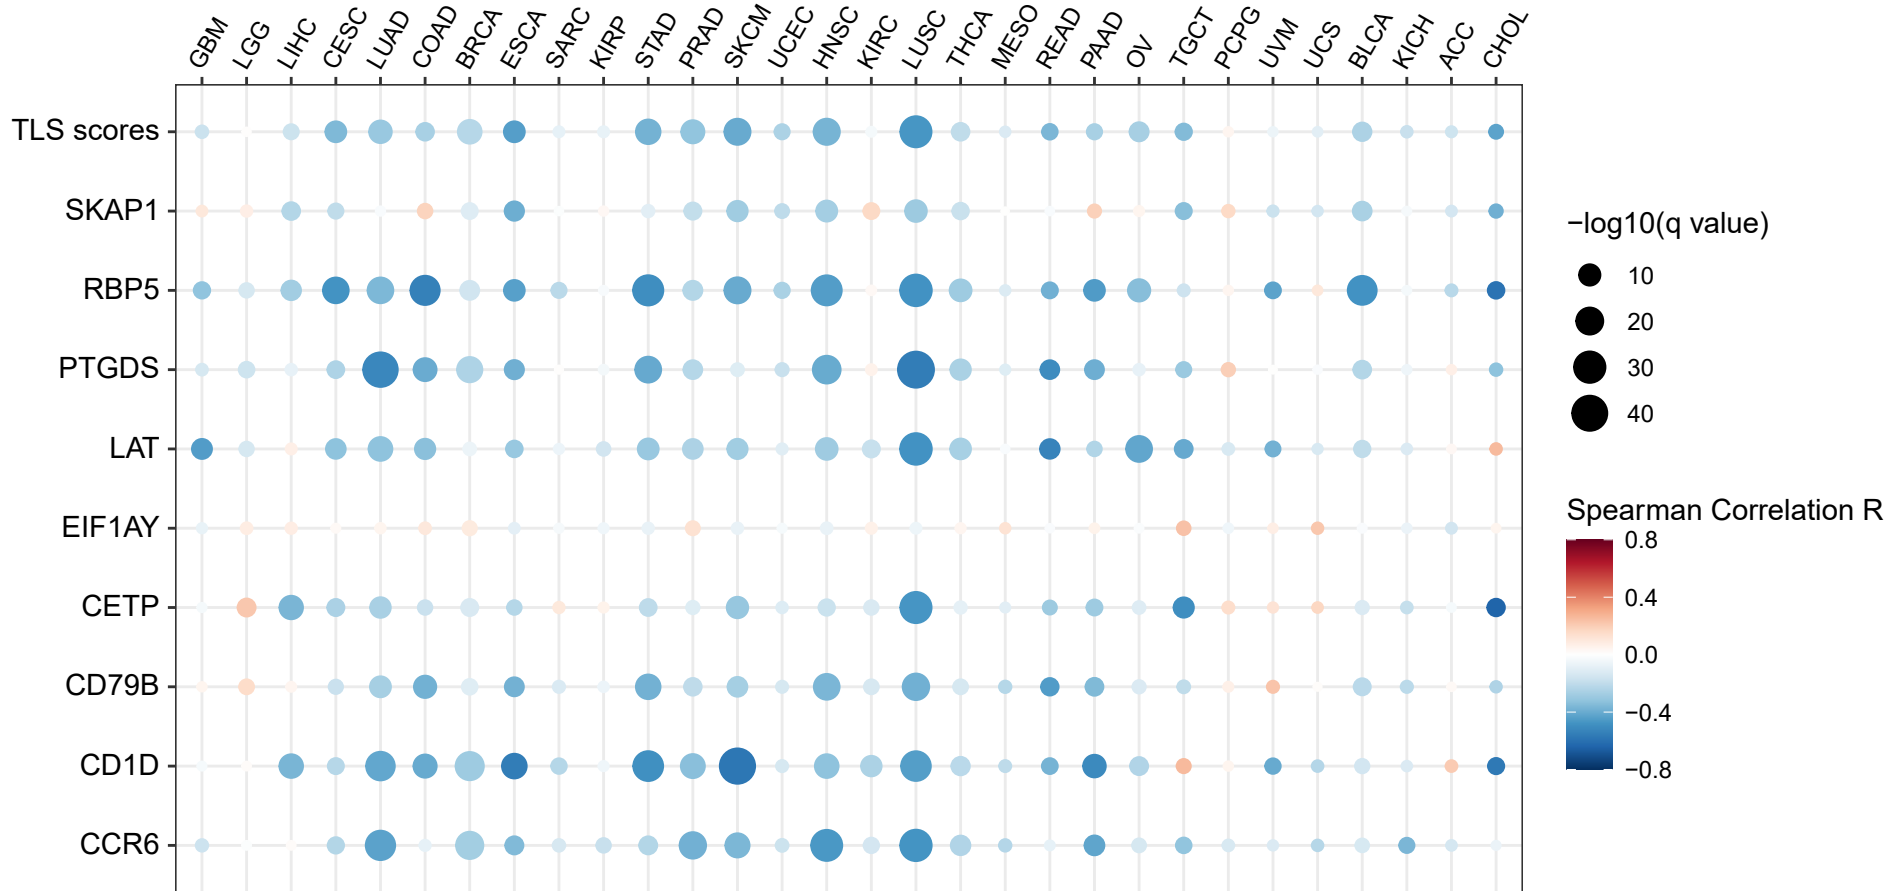

**Figure S4. Association Stem.Sig and expression level of TLS-related genes.** TLS score was calculated as the mean gene expression of TLS-related genes.

# Reference

1. Malta TM, Sokolov A, Gentles AJ, Burzykowski T, Poisson L, Weinstein JN, et al. Machine Learning Identifies Stemness Features Associated with Oncogenic Dedifferentiation. *Cell*. 2018;173:338-354.e15. <https://doi.org/10.1016/j.cell.2018.03.034>
2. Miranda A, Hamilton PT, Zhang AW, Pattnaik S, Becht E, Mezheyeuski A, et al. Cancer stemness, intratumoral heterogeneity, and immune response across cancers. *Proc Natl Acad Sci*. 2019;116:9020–9. <https://doi.org/10.1073/pnas.1818210116>
3. Shats I, Gatza ML, Chang JT, Mori S, Wang J, Rich J, et al. Using a Stem Cell–Based Signature to Guide Therapeutic Selection in Cancer. *Cancer Res*. 2011;71:1772–80. <https://doi.org/10.1158/0008-5472.CAN-10-1735>
4. Ben-Porath I, Thomson MW, Carey VJ, Ge R, Bell GW, Regev A, et al. An embryonic stem cell–like gene expression signature in poorly differentiated aggressive human tumors. *Nat Genet*. 2008;40:499–507. <https://doi.org/10.1038/ng.127>
5. Palmer NP, Schmid PR, Berger B, Kohane IS. A gene expression profile of stem cell pluripotentiality and differentiation is conserved across diverse solid and hematopoietic cancers. *Genome Biol*. 2012;13:R71. <https://doi.org/10.1186/gb-2012-13-8-r71>
6. Bhattacharya B, Miura T, Brandenberger R, Mejido J, Luo Y, Yang AX, et al. Gene expression in human embryonic stem cell lines: unique molecular signature. *Blood*. 2004;103:2956–64. <https://doi.org/10.1182/blood-2003-09-3314>
